# Supplementary material for: Characterization of Mitochondrial Alterations in Aicardi–Goutières Patients Mutated in RNASEH2A and RNASEH2B Genes
Source: MDPI journal article supplement (doi:10.3390/ijms232214482), 2022-11-21
Supplement: s1 [file s1]

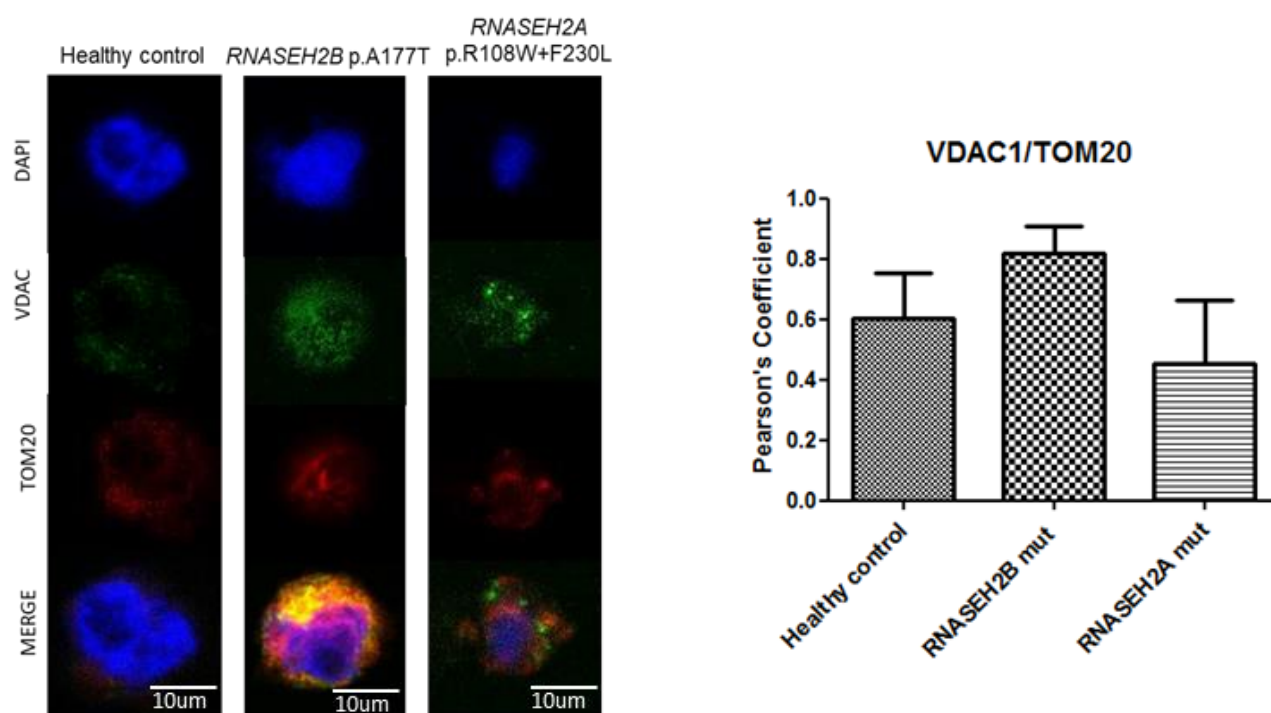

**Figure S1.** Fluorescence colocalization analysis (Pearson's coefficient) of LCLs derived from a healthy control and AGS patients mutated in *RNASEH2B* and *RNASEH2A* genes stained with VDAC1 antibody (green), TOM20 (red) and DAPI for nuclear staining (blue).

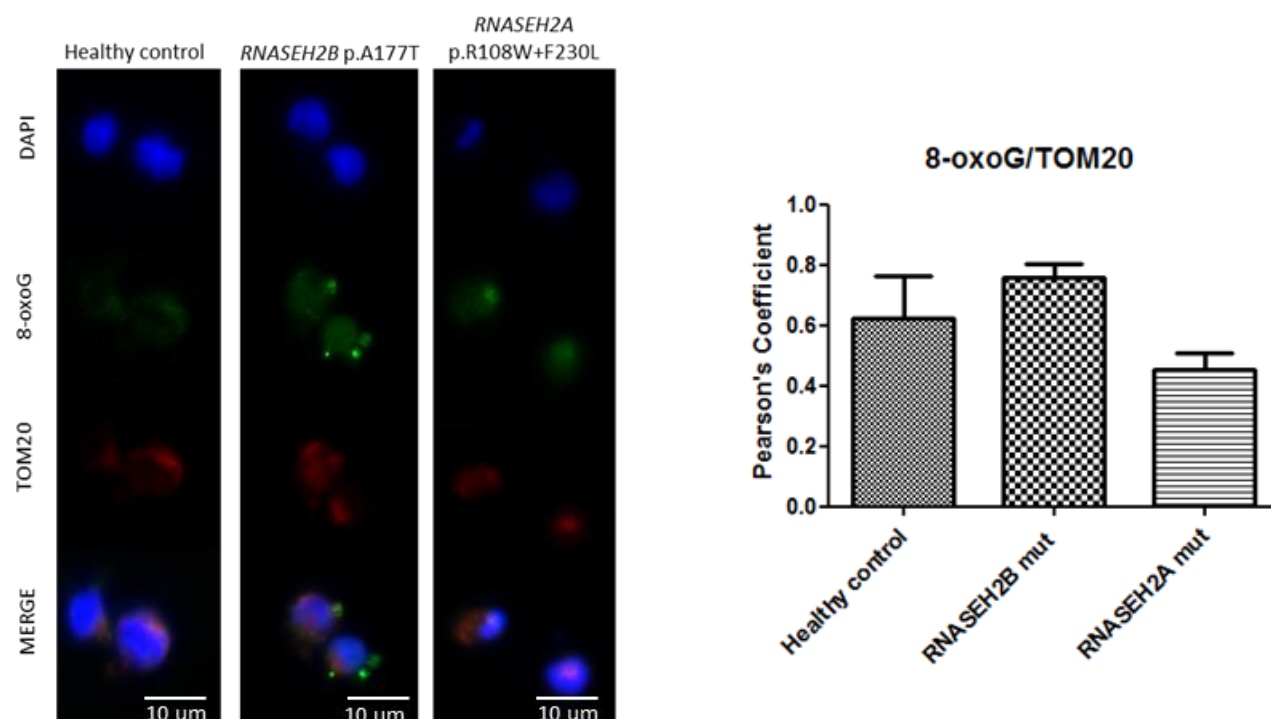

**Figure S2.** Fluorescence colocalization analysis (Pearson's coefficient) of LCLs derived from a healthy control and AGS patients mutated in *RNASEH2B* and *RNASEH2A* genes stained with 8-oxoG antibody (green), TOM20 (red) and DAPI for nuclear staining (blue).
